# Supplementary material for: A composite film of TiS2/PEDOT:PSS as the electrocatalyst for the counter electrode in dye-sensitized solar cells
Source: Royal Society of Chemistry journal article supplement (doi:10.1039/c3ta12603j), 2013-01-01
Supplement: c3ta12603j.pdf [file c3ta12603j.pdf]

## Electronic Supplementary Information

### A Composite Film of $\text{TiS}_2$ /PEDOT:PSS as the Electrocatalyst for the Counter Electrode in Dye-sensitized Solar Cells

Chun-Ting Li,<sup>a</sup> Yu-Yan Li,<sup>a</sup> Chuan-Pei Lee,<sup>a</sup> Min-Hsin Yeh,<sup>a</sup> and Kuo-Chuan Ho<sup>a,b,\*</sup>

<sup>a</sup> Department of Chemical Engineering, National Taiwan University, Taipei 10617, Taiwan

<sup>b</sup> Institute of Polymer Science and Engineering, National Taiwan University, Taipei 10617, Taiwan

\* To whom correspondence should be addressed: [kcho@ntu.edu.tw](mailto:kcho@ntu.edu.tw) (K. C. Ho)

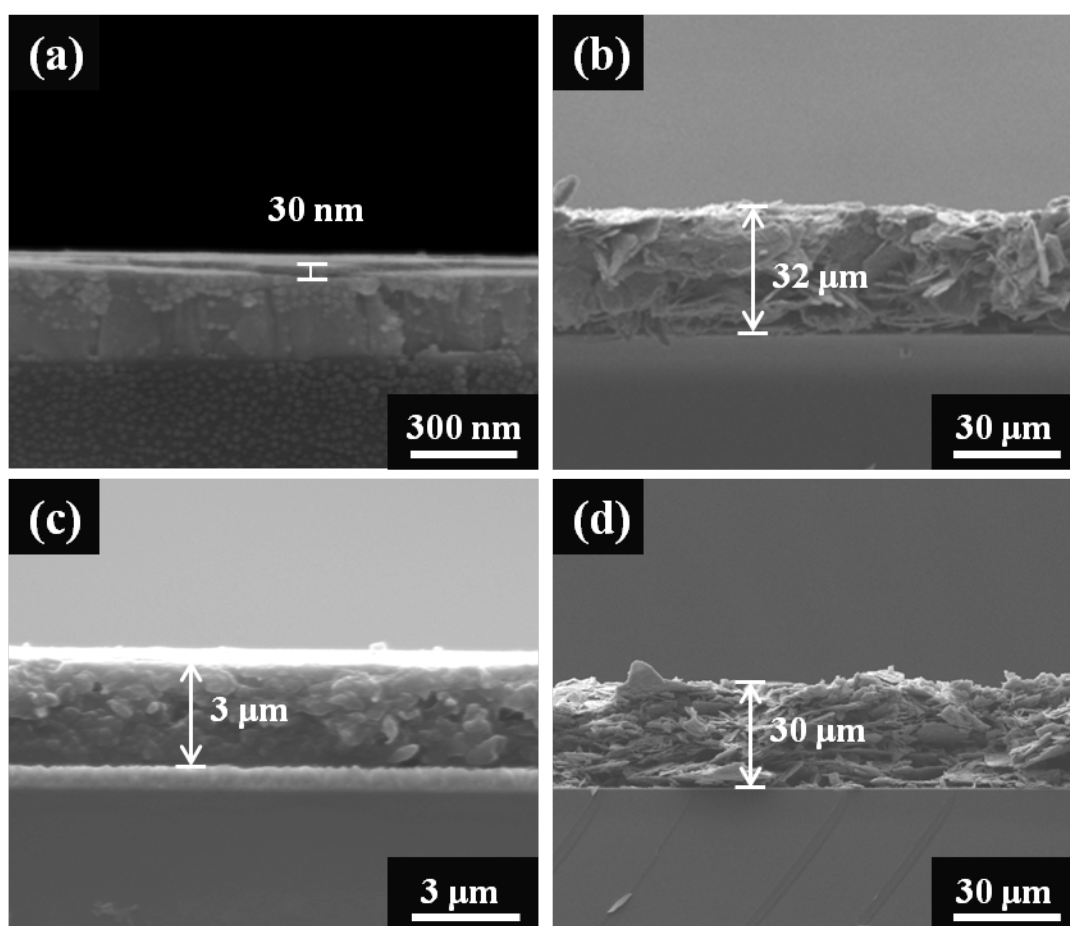

**Fig. S1** FE-SEM images for the cross-section of (a) Pt, (b) bare  $\text{TiS}_2$ , (c) bare PEDOT:PSS, and (d) the composite  $\text{TiS}_2$ /PEDOT:PSS CEs.

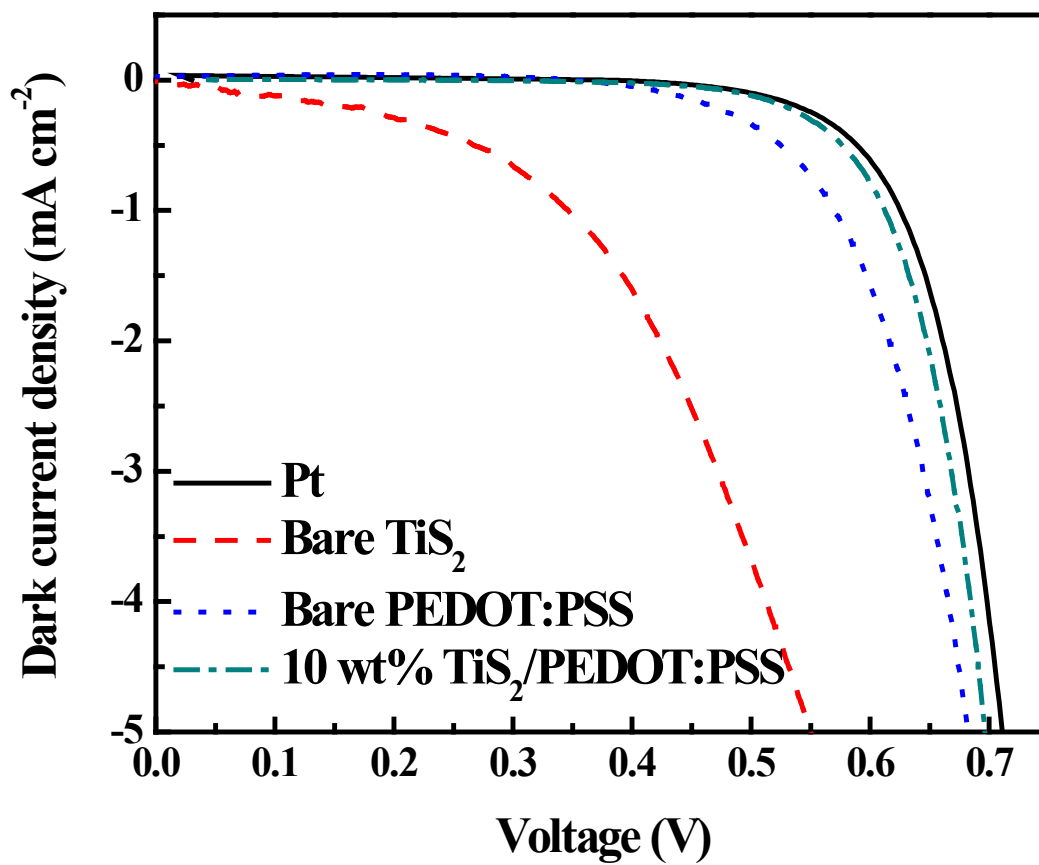

**Fig. S2** Dark current density-voltage curves of DSSCs with various CEs, measured under dark condition.

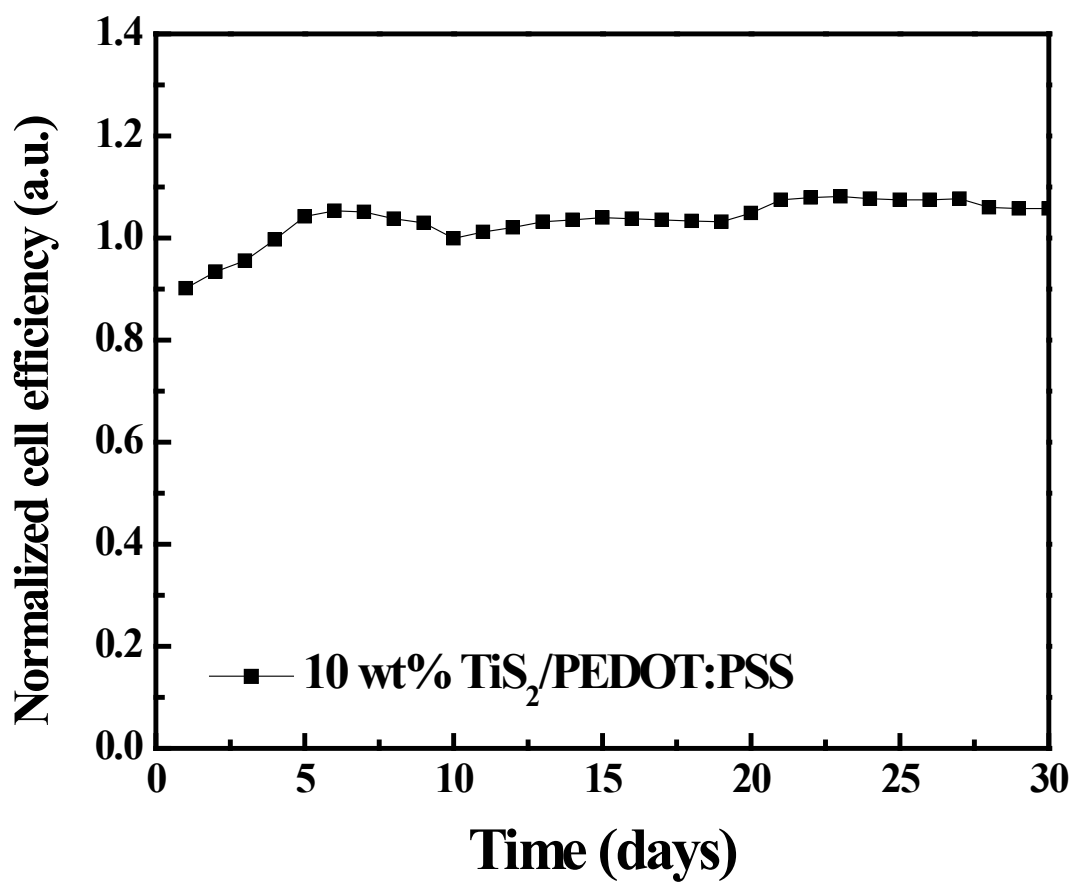

Fig. S3 The at-rest long-term stability data of the DSSCs with a composite 10 wt% TiS<sub>2</sub>/PEDOT:PSS CE in an ionic liquid-based electrolyte system.
